# Supplementary material for: NSD1 Mutations in Sotos Syndrome Induce Differential Expression of Long Noncoding RNAs, miR646 and Genes Controlling the G2/M Checkpoint
Source: MDPI journal article supplement (doi:10.3390/life12070988), 2022-07-02
Supplement: s1 [file s1]

## Supplementary Tables

| <b>TableS1. Characteristics of healthy parents</b> |                        |                             |                                 |
|----------------------------------------------------|------------------------|-----------------------------|---------------------------------|
| <b>Number</b>                                      | <b>Sex<sup>a</sup></b> | <b>Nucleotide change</b>    | <b>Predicted protein change</b> |
| 1                                                  | M                      | c.4497+1_4497+7delinsTCTGGA | p.?                             |
| 2                                                  | M                      | del ex6                     | p.?                             |
| 3                                                  | F                      | c.1633delA                  | Thr545Argfs*10                  |
| 4                                                  | M                      | c.2386_2389del              | Glu796Ilefs*10                  |
| 5                                                  | M                      | c.6259-2A>G                 | p.?                             |
| 6                                                  | F                      | c.6485A>G                   | His2162Arg                      |
| 7                                                  | M                      | c.5644_5655delinsTGTA       | Val1882Cysfs*7                  |
| 8                                                  | F                      | del5q35.2-q35.3             |                                 |
| 9                                                  | F                      | c.5146+1G>A                 | p.?                             |
| 10                                                 | M                      | c.6010-10G<A                | p.?                             |
| 11                                                 | F                      | c.3958C>T                   | Arg1320*                        |
| 12                                                 | M                      | c.6047_6050dup              | Phe2018Serfs*12                 |
| 13                                                 | M                      | del5q35.2-q35.3             |                                 |
| 14                                                 | M                      | del5q35.2-q35.3             |                                 |
| 15                                                 | M                      | c.1482C>A                   | Cys494*                         |

<sup>a</sup> M: Male; F: Female

| <b>Table S2. Characteristics of healthy parents</b> |                        |                                         |
|-----------------------------------------------------|------------------------|-----------------------------------------|
| <b>Number</b>                                       | <b>Sex<sup>a</sup></b> | <b>Identifier in our previous study</b> |
| 1                                                   | F                      | Ctr443                                  |
| 2                                                   | F                      | Ctr848                                  |
| 3                                                   | M                      | Ctr626                                  |
| 4                                                   | M                      | Ctr840                                  |
| 5                                                   | M                      | Ctr002                                  |

<sup>a</sup> M: Male; F: Female

**Table S3. Primers of differentially expressed genes used for validation by real-time PCR**

| Gene Symbol   | RefSeq Tran-script ID | Forward Primers                | Reverse Primers             | Pro duct size ( bp) | Temp |
|---------------|-----------------------|--------------------------------|-----------------------------|---------------------|------|
| NSO3          | NM_000603             | 5'CCAGCTAGCCA AAGTCACCAT3'     | 5'GTCTCGGAGCC ATACAGGATT3'  | 175                 | 60°C |
| CD19          | NM_001770             | 5'TCAGCTGTGAC TTTGGCTTATCT G3' | 5'AGTCATTTCGCTT TCTTTTCCT3' | 120                 | 60°C |
| NDRG2         | NM_0012822 13         | 5'ACTGTCTATGG CACCCCCAA3'      | 5'TCGAACTGAAA CAGTGGCTGG3'  | 188                 | 60°C |
| SFN           | NM_006142             | 5'CAGGCTACTTC TCCCCTCCT3'      | 5'TCAATCTCGGT CTTGCACTG3'   | 100                 | 60°C |
| SORBS1        | NM_0010349 54         | 5'CAGGCTACTTC TCCCCTCCT3'      | 5'TCAATCTCGGT CTTGCACTG3'   | 119                 | 60°C |
| lnc-C00665    | NC_000019. 10         | 5'GTTTCACCATG TTGGCCAGG3'      | 5'GAAAACTCTGC CAGGGAGCA 3'  | 45                  | 60°C |
| lnc-C2orf84-1 | NM_0010407 10         | 5'GCCAAGAACAC ACTCTCATT3'      | 5'GTGGTCTGAAG CATCTGATT3'   | 50                  | 60°C |
| lnc-C20orf197 | NM_173644             | 5'TGCTGGATACC TGAGGACTC3'      | 5'CTGGTCTAAGG TATCTTTGC3'   | 20                  | 60°C |
| MIR646        | NR_046099             | 5'GTGACAGATCT GAGACAAAC3'      | 5'CAAGCTGGTCC CTTTAATGG3'   | 22                  | 60°C |
| ZNF883        | NM_0011013 38         | 5'TGACCGCGAA CCCATATCTC3'      | 5'GTTTCTCTCCAG TATGTATT3'   | 28                  | 60°C |
| GSC           | NM_173849             | 5'GTTTCAGCATCG ACAACATCC3'     | 5'TAGAAGGCGCC ATAGTCCGA3'   | 150                 | 60°C |
| lnc-C15orf57  | NM_052849             | 5'ATGTTTGAGAG CGCTGACTC3'      | 5'TCAGGGCAAGA ATCCACAAA3'   |                     | 60°C |

| <b>Table S4. Significantly enriched gene sets in SoS samples by GSEA</b> |                                    |                                |                                       |                             |
|--------------------------------------------------------------------------|------------------------------------|--------------------------------|---------------------------------------|-----------------------------|
| <b>Pathway or Process Description<sup>a</sup></b>                        | <b>Number of Genes<sup>b</sup></b> | <b>FDR q-Value<sup>c</sup></b> | <b>Type of Regulation<sup>d</sup></b> | <b>Ontology<sup>e</sup></b> |
| <b>Cancer process</b>                                                    |                                    |                                |                                       |                             |
| Florio neocortex basal radial glia DN                                    | 151                                | 0.00                           | DOWN                                  | CGP                         |
| Rosty cervical cancer proliferation cluster                              | 114                                | 0.00                           | DOWN                                  | CGP                         |
| Kong E2F3 targets                                                        | 77                                 | 0.00                           | DOWN                                  | CGP                         |
| Lee early T lymphocyte up                                                | 85                                 | 0.00                           | DOWN                                  | CGP                         |
| Kobayashi EGFR signaling 24hr DN                                         | 213                                | 0.00                           | DOWN                                  | CGP                         |
| Whitfield cell cycle literature                                          | 39                                 | 0.00                           | DOWN                                  | CGP                         |
| Whiteford pediatric cancer markers                                       | 102                                | 0.00                           | DOWN                                  | CGP                         |
| Nakayama soft tissue tumors PCA2 UP                                      | 76                                 | 0.00                           | DOWN                                  | CGP                         |
| Zhan multiple myeloma pr UP                                              | 35                                 | 0.00                           | DOWN                                  | CGP                         |
| Pyeon HPV positive tumors UP                                             | 79                                 | 0.00                           | DOWN                                  | CGP                         |
| Sotiriou breast cancer grade 1 VS 3 UP                                   | 127                                | 3.65 x10 <sup>-4</sup>         | DOWN                                  | CGP                         |
| Chiang liver cancer subclass proliferation UP                            | 146                                | 8.15 x10 <sup>-4</sup>         | DOWN                                  | CGP                         |
| Farmer breast cancer cluster 2                                           | 29                                 | 0.001                          | DOWN                                  | CGP                         |
| Villanueva liver cancer KRT19 UP                                         | 147                                | 0.002                          | DOWN                                  | CGP                         |
| Rodrigues thyroid carcinoma DN                                           | 66                                 | 0.002                          | DOWN                                  | CGP                         |
| Finetti breast cancer kinome red                                         | 15                                 | 0.002                          | DOWN                                  | CGP                         |
| Riggi Ewing sarcoma progenitor DN                                        | 158                                | 0.002                          | DOWN                                  | CGP                         |
| Azare neoplastic transformation by STAT3 DN                              | 16                                 | 0.002                          | DOWN                                  | CGP                         |
| West adrenocortical tumor markers UP                                     | 103                                | 0.005                          | DOWN                                  | CGP                         |
| Li Wilms tumor anaplastic UP                                             | 15                                 | 0.010                          | DOWN                                  | CGP                         |
| Li prostate cancer epigenetic                                            | 27                                 | 0.014                          | DOWN                                  | CGP                         |
| GAL leukemic stem cell DN                                                | 188                                | 0.014                          | DOWN                                  | CGP                         |
| Rickman head and neck cancer B                                           | 37                                 | 0.018                          | DOWN                                  | CGP                         |
| Poola invasive breast cancer UP                                          | 228                                | 0.019                          | DOWN                                  | CGP                         |
| Sengupta nasopharyngeal carcinoma UP                                     | 240                                | 0.024                          | DOWN                                  | CGP                         |
| SMID breast cancer luminal A UP                                          | 68                                 | 0.025                          | DOWN                                  | CGP                         |
| Vantveer breast cancer BRCA1 UP                                          | 28                                 | 0.027                          | DOWN                                  | CGP                         |
| Winnepenninckx melanoma metastasis UP                                    | 134                                | 0.029                          | DOWN                                  | CGP                         |
| Ferreira Ewings sarcoma unstable VS stable UP                            | 131                                | 0.029                          | DOWN                                  | CGP                         |
| Lopes methylated in colon cancer UP                                      | 22                                 | 0.047                          | DOWN                                  | CGP                         |

|                                                  |     |       |      |     |
|--------------------------------------------------|-----|-------|------|-----|
| Chiaradonna neoplastic transformation<br>KRAS UP | 113 | 0.047 | DOWN | CGP |
| Andersen cholangiocarcinoma class2               | 143 | 0.048 | DOWN | CGP |
| Boyault liver cancer subclass G5 DN              | 20  | 0.048 | DOWN | CGP |

#### Cell cycle and proliferation process

|                                                  |     |                       |      |     |
|--------------------------------------------------|-----|-----------------------|------|-----|
| Boyault liver cancer subclass G23 UP             | 44  | 0.025                 | DOWN | CGP |
| Whitfield cell cycle literature                  | 116 | 0.00                  | DOWN | CGP |
| Fischer G2 M cell cycle                          | 191 | 0.00                  | DOWN | CGP |
| Croonquist NRAS signaling DN                     | 55  | 0.00                  | DOWN | CGP |
| Molenaar targets of CCND1 and CDK4<br>DN         | 48  | 0.00                  | DOWN | CGP |
| Ishida E2F targets                               | 39  | 0.00                  | DOWN | CGP |
| Reichert mitosis LIN9 targets                    | 21  | 0.00                  | DOWN | CGP |
| Graham normal quiescent VS normal<br>dividing DN | 74  | $1.15 \times 10^{-4}$ | DOWN | CGP |
| Odonnell TFRC targets DN                         | 110 | $2.18 \times 10^{-4}$ | DOWN | CGP |
| Burton adipogenesis 3                            | 85  | $3.49 \times 10^{-4}$ | DOWN | CGP |
| Chemnitz response to prostaglandin E2<br>UP      | 112 | 0.001                 | DOWN | CGP |
| Graham cml dividing VS normal<br>quiescent UP    | 157 | 0.002                 | DOWN | CGP |
| Osada ASCL1 targets UP                           | 33  | 0.002                 | DOWN | CGP |
| Eguchi cell cycle RB1 targets                    | 17  | 0.002                 | DOWN | CGP |
| Burton adipogenesis peak at 24HR                 | 41  | 0.002                 | DOWN | CGP |
| Yu MYC targets UP                                | 40  | 0.003                 | DOWN | CGP |
| Smirnov response to IR 6HR DN                    | 88  | 0.003                 | DOWN | CGP |
| Zhou cell cycle genes in IR response<br>24HR     | 103 | 0.003                 | DOWN | CGP |
| Odonnell targets of MYC and TFRC DN              | 36  | 0.006                 | DOWN | CGP |
| Alcalay AML by NPM1 localization DN              | 158 | 0.010                 | DOWN | CGP |
| Zhou cell cycle genes in IR Response<br>6HR      | 70  | 0.011                 | DOWN | CGP |
| Hernandez mitotic arrest by docetaxel 1<br>UP    | 27  | 0.012                 | DOWN | CGP |
| Berenjeno transformed by RHOA<br>forever DN      | 25  | 0.015                 | DOWN | CGP |
| Plasari TGFB1 targets 10HR DN                    | 205 | 0.014                 | DOWN | CGP |
| Wilcox response to progesterone UP               | 125 | 0.018                 | DOWN | CGP |
| Chicas RB1 targets growing                       | 196 | 0.02                  | DOWN | CGP |

|                                                                       |     |        |      |       |
|-----------------------------------------------------------------------|-----|--------|------|-------|
| ULE splicing via NOVA2                                                | 35  | 0.02   | DOWN | CGP   |
| Benporath proliferation                                               | 124 | 0.033  | DOWN | CGP   |
| Whitfield cell cycle G2 M                                             | 162 | 0.034  | DOWN | CGP   |
| Liang silenced by methylation 2                                       | 50  | 0.034  | DOWN | CGP   |
| Nojima SFRP2 targets DN                                               | 19  | 0.034  | DOWN | CGP   |
| Kamminga EZH2 targets                                                 | 37  | 0.037  | DOWN | CGP   |
| Graham CML quiescent_VS normal quiescent UP                           | 74  | 0.040  | DOWN | CGP   |
| GOBP heat generation                                                  | 15  | 0.014  | UP   | GO BP |
| GOBP regulation of meiotic cell cycle                                 | 31  | 0.07   | UP   | GO BP |
| GOBP negative regulation of nuclear division                          | 42  | 0.016  | UP   | GO BP |
| GOBP regulation of feeding behavior                                   | 20  | 0.021  | UP   | GO BP |
| GOBP positive regulation of organic acid transport                    | 29  | 0.017  | UP   | GO BP |
| GOBP regulation of nuclear division organization                      | 106 | 0.046  | UP   | GO BP |
| GOBP kinetochore organization                                         | 16  | 0.041  | UP   | GO BP |
| HALLMARK G2M checkpoint                                               | 172 | 0.001  | DOWN | H     |
| HALLMARK KRAS signaling UP                                            | 174 | 0.0001 | DOWN | H     |
| HALLMARK mitotic spindle                                              | 163 | 0.008  | DOWN | H     |
| HALLMARK inflammatory response                                        | 159 | 0.006  | DOWN | H     |
| HALLMARK E2F targets                                                  | 167 | 0.005  | DOWN | H     |
| HALLMARK apoptosis                                                    | 130 | 0.017  | DOWN | H     |
| HALLMARK KRAS signaling DN                                            | 166 | 0.032  | DOWN | H     |
| HALLMARK allograft rejection                                          | 160 | 0.036  | DOWN | H     |
| HALLMARK TNFA signaling via NFkB                                      | 163 | 0.040  | DOWN | H     |
| <b>Cell differentiation process</b>                                   |     |        |      |       |
| Boquest stem cell DN                                                  | 186 | 0.05   | DOWN | CGP   |
| Sarrio epithelial mesenchymal transition UP                           | 149 | 0.006  | DOWN | CGP   |
| Le neuronal differentiation DN                                        | 16  | 0.034  | DOWN | CGP   |
| Mori immature B lymphocyte DN                                         | 74  | 0.02   | DOWN | CGP   |
| Hoffmann large to small pre bii lymphocyte UP                         | 127 | 0.007  | DOWN | CGP   |
| <b>P53 mediated Cell cycle arrest and cellular senescence process</b> |     |        |      |       |
| Wu apoptosis by CDKN1A via TP53                                       | 47  | 0.002  | DOWN | CGP   |
| Tang senescence TP53 targets DN                                       | 48  | 0.00   | DOWN | CGP   |

**a.** Official name of biological process. **b.** Number of genes of biological process **c.** FDR q-value estimates the significance of the enrichment of a biological

process or a pathway. FDR q-value  $\leq 0.05$  are considered acceptable. **d.** Type of regulation of the genes involved in a process or a pathway. **e.** Name of the ontology defining a biological process or pathway. GO BP: stands for gene ontology biological process, H: Hallmark pathways, CGP: chemical and genetic perturbations pathways

## Supplementary figures

| Probe Name      | Log(Relative Conc.) | Median(Log Proc. Sig.) | % CV  | StdDev |
|-----------------|---------------------|------------------------|-------|--------|
| (+)E1A_r60_3    | 0.30                | 0.38                   | 54.90 | 0.24   |
| (+)E1A_r60_a104 | 1.30                | 0.42                   | 48.50 | 0.23   |
| (+)E1A_r60_a107 | 2.30                | 1.45                   | 37.38 | 0.17   |
| (+)E1A_r60_a135 | 3.30                | 2.35                   | 45.80 | 0.20   |
| (+)E1A_r60_a20  | 3.83                | 2.54                   | 39.87 | 0.15   |
| (+)E1A_r60_a22  | 4.30                | 2.99                   | 30.74 | 0.12   |
| (+)E1A_r60_a97  | 4.82                | 3.76                   | 51.01 | 0.23   |
| (+)E1A_r60_n11  | 5.30                | 4.31                   | 31.33 | 0.14   |
| (+)E1A_r60_n9   | 5.82                | 4.31                   | 35.96 | 0.17   |
| (+)E1A_r60_1    | 6.30                | 4.83                   | 41.69 | 0.16   |

Agilent SpikeIns: %CV of Avg. Processed Signal Plot

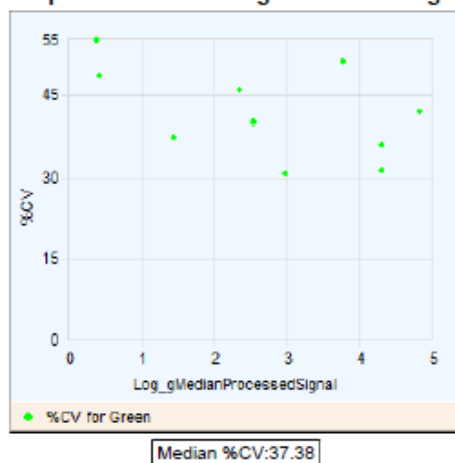

Agilent SpikeIns: Log(Signal) vs. Log(Relative concentration) Plot

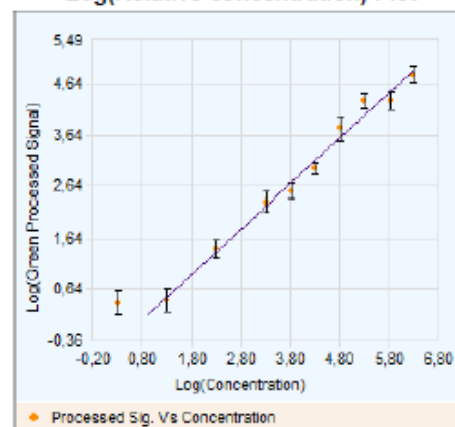

Agilent Spike-In Concentration-Response Statistics

Linear Range Statistics:

|                             |       |
|-----------------------------|-------|
| Low Signal                  | -0.14 |
| High Signal                 | 5.94  |
| Low Relative Concentration  | 0.59  |
| High Relative Concentration | 7.47  |
| Slope                       | 0.88  |
| R <sup>2</sup> Value        | 0.99  |

Evaluation Metrics for GE1\_QCMT\_Jun14

Good (5) ; Evaluate (5)

| Metric Name              | Value | Excellent | Good         | Evaluate       |
|--------------------------|-------|-----------|--------------|----------------|
| IsGoodGrid               | 0.00  |           | >1           | <1             |
| AnyColorPrntFeatNonU...  | 0.06  |           | <1           | >1             |
| gNegCtrlAveNetSig        | 17.88 |           | <40          | >40            |
| gNegCtrlAveBGSubSig      | -1.58 |           | -10 to 5     | <-10 or >5     |
| gNegCtrlISDevBGSubSig    | 1.63  |           | <10          | >10            |
| gSpatialDetrendRMSFI...  | 1.94  |           | <15          | >15            |
| gNonCtrlMedCVPProcSig... | 39.64 |           | 0 to 8       | <0 or >8       |
| gE1aMedCVPProcSignal     | 37.38 |           | 0 to 8       | <0 or >8       |
| absGE1E1aSlope           | 0.88  |           | 0.90 to 1.20 | <0.90 or >1.20 |
| DetectionLimit           | -0.62 |           | 0.01 to 2    | <0.01 or >2    |

• Excellent • Good • Evaluate

Signal Detection Limit Statistics

|                          |       |
|--------------------------|-------|
| Saturation Point         | 5.89  |
| Low Threshold            | -0.25 |
| Low Threshold Error      | 0.33  |
| Spike-In Detection Limit | -0.62 |

**Supplementary Figure S1. Quality control report for sample 19.** In table are reported in red parametric value that was not conformed to quality control, and in blu are indicated parametric value accepted by quality control.

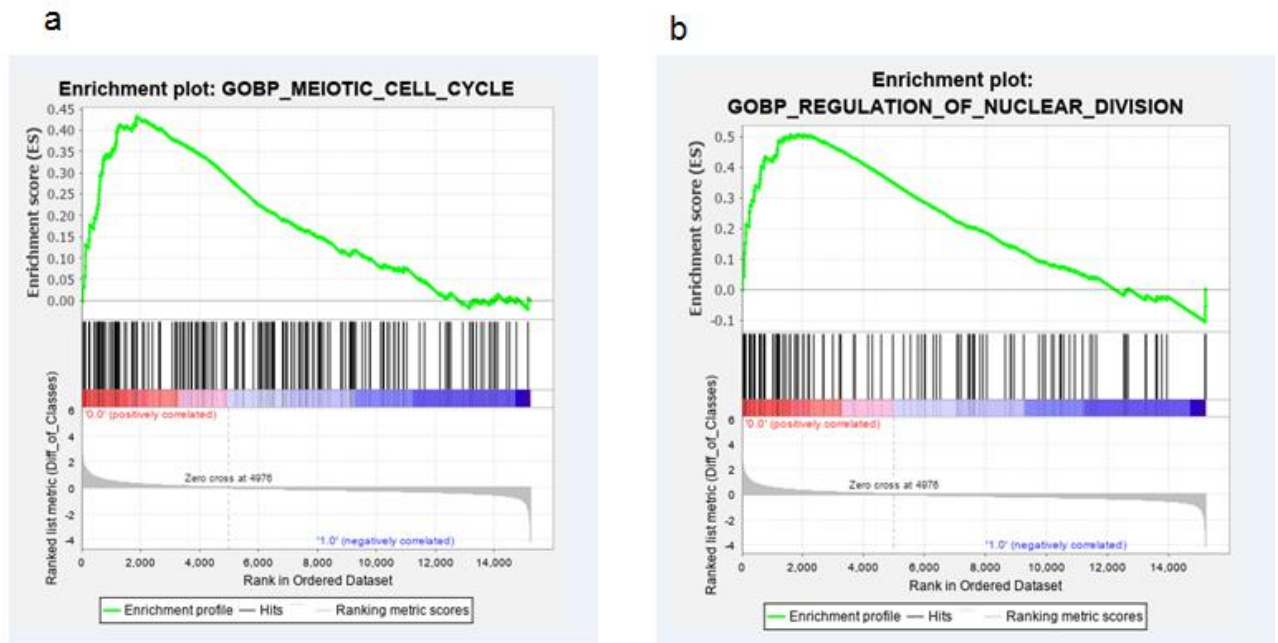

**Supplementary Figure S2. Enrichment plots of representative over represented biological processes in SoS fibroblasts samples by GSEA. (a) Plots are relative to meiotic cell cycle (b) and regulation of nucleardivision.**

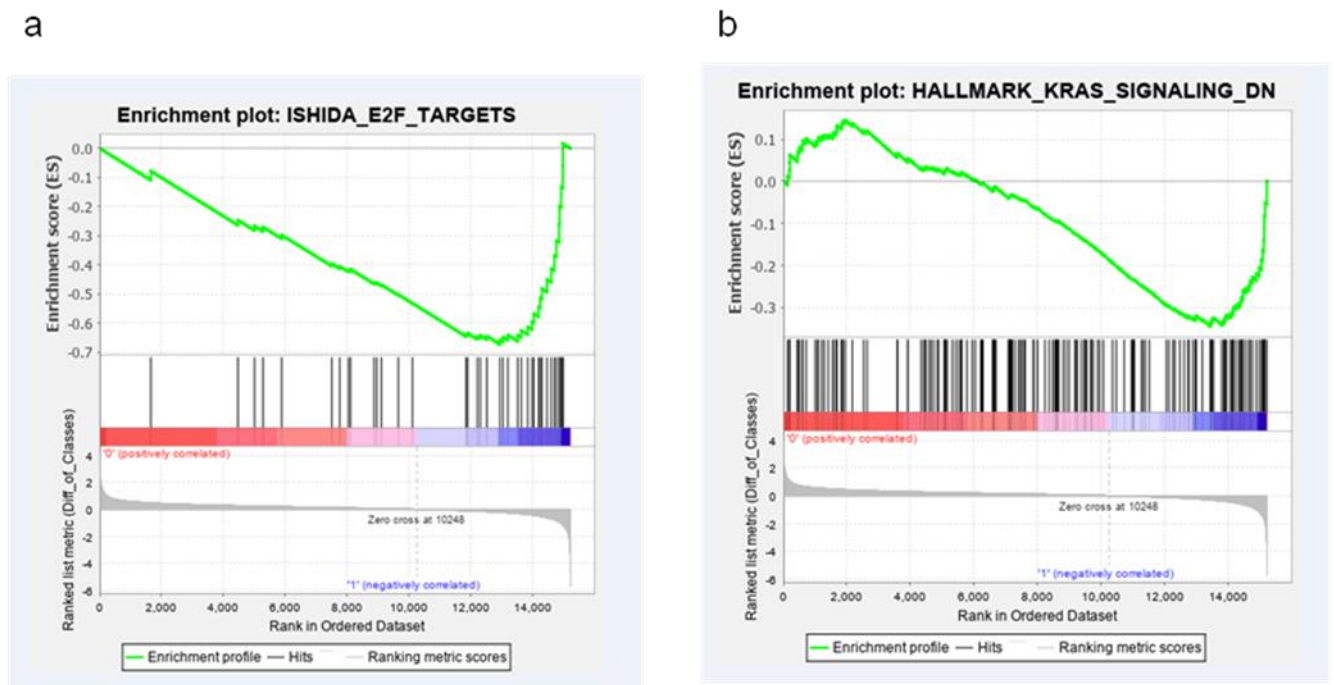

**Supplementary Figure S3. Enrichment plots of representative down represented C2,CGP and hallmark gene sets in SoS fibroblasts samples by GSEA. (a) Plots are relative to: E2F target (b) and KRAS signaling.**
